# Supplementary material
Source: PubMed Central journal article supplement (PMC10640703)
Supplement: jamacardiol-e234859-s003.pdf [file jamacardiol-e234859-s003.pdf]

## Data Sharing Statement

Cunningham. Natural Language Processing for Adjudication of Heart Failure in a Multicenter Clinical Trial. *JAMA Cardiol.* Published November 11, 2023. doi:10.1001/jamacardio.2023.4859

### Data

**Data available:** Yes

**Data types:** Deidentified participant data

**How to access data:** Data Availability Statement: Deidentified participant data from the INVESTED trial will be available on the NHLBI Biolincc website to qualified researchers as per NHLBI guidelines.

**When available:** beginning date: 11-01-2025

### Supporting Documents

**Document types:** None

### Additional Information

**Who can access the data:** Qualified researchers per NHLBI guidelines

**Types of analyses:** Any purpose

**Mechanisms of data availability:** Through NHLBI BIOLINCC website
